# Supplementary material
Source: Springer Nature journal article supplement (https://www.springermedizin.de/resource/supplementary/13054_2013_3040_MOESM6_ESM.pdf/9712454)
Supplement: MOESM6 [file 9712454]

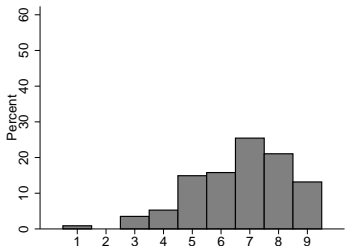

Research to date has not adequately addressed concerns about antibiotic resistance and SDD

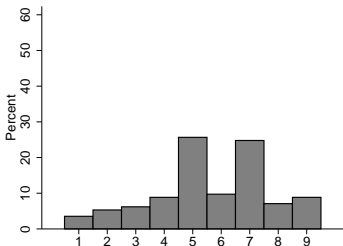

The SDD evidence base is not generalisable to my country

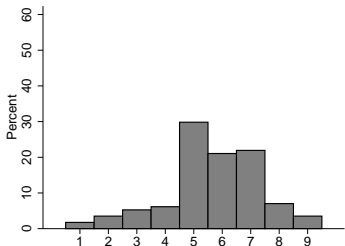

SDD increases antibiotic resistance

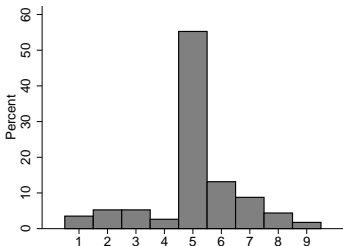

SDD would increase ICU *Clostridium difficile* infections

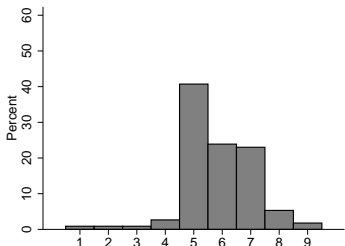

Overall, SDD benefits the patients to whom it is delivered

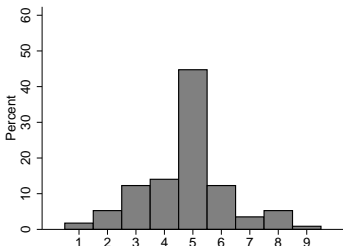

The risks of SDD outweigh the benefits
